# Supplementary material for: Plasmodium falciparum in the southeastern Atlantic forest: a challenge to the bromeliad-malaria paradigm?
Source: Springer Nature journal article supplement (doi:10.1186/s12936-015-0680-9), 2015-04-24
Supplement: MOESM2 [file 9761236]

**Additional file 2 CDC-LT and Shannon traps utilized for field collections per landscape, Atlantic forest, Brazil, August-November 2012**

| <b>Landscape</b> | <b>Date of collection</b> | <b>Trap (sampling effort)</b> |
|------------------|---------------------------|-------------------------------|
| 1-A              | 22 Aug 2012               | CDC-LT (72-hours)             |
| 1-A              | 23 Aug 2012               | CDC-LT (72-hours)             |
| 1-A              | 17-18 Oct 2012            | Shannon trap (12 hours)       |
| 1-B              | 13 Aug 2012               | CDC-LT (72-hours)             |
| 1-B              | 14 Aug 2012               | CDC-LT (72-hours)             |
| 1-C              | 15 Aug 2012               | CDC-LT (72-hours)             |
| 1-C              | 16 Aug 2012               | CDC-LT (72-hours)             |
| 2                | 20 Aug 2012               | CDC-LT (72-hours)             |
| 2                | 21 Aug 2012               | CDC-LT (72-hours)             |
| 2                | 12-13 Sept 2012           | Shannon trap (12 hours)       |
| 3                | 29 Aug 2012               | CDC-LT (72-hours)             |
| 3                | 30 Aug 2012               | CDC-LT (72-hours)             |
| 3                | 24-25 Oct 2012            | Shannon trap (12 hours)       |
| 4                | 27 Aug 2012               | CDC-LT (72-hours)             |
| 4                | 28 Aug 2012               | CDC-LT (72-hours)             |
| 4                | 19-20 Sept 2012           | Shannon trap (12 hours)       |
| 5                | 28 Nov 2012               | Shannon trap (3 hours)        |
