# Supplementary material for: Plasmodium falciparum in the southeastern Atlantic forest: a challenge to the bromeliad-malaria paradigm?
Source: Springer Nature journal article supplement (doi:10.1186/s12936-015-0680-9), 2015-04-24
Supplement: MOESM3 [file 9761236]

**Additional file 3 Successful amplification of *Plasmodium* species in *Anopheles* species per type of PCR method, Atlantic forest, Brazil, August-November 2012**

| <b>Species</b>          | <b><i>Plasmodium</i></b> | <b>Successful amplification from real-time PCR</b> | <b>Successful amplification from conventional PCR</b> | <b><i>Plasmodium</i> DNA sequencing</b> |
|-------------------------|--------------------------|----------------------------------------------------|-------------------------------------------------------|-----------------------------------------|
| <i>An. cruzii</i>       | <i>P. falciparum</i>     | Yes                                                | Yes                                                   | Yes                                     |
| <i>An. cruzii</i>       | <i>P. falciparum</i>     | Yes                                                | Yes                                                   | Yes                                     |
| <i>An. cruzii</i>       | <i>P. falciparum</i>     | Yes                                                | Yes                                                   | Yes                                     |
| <i>An. cruzii</i>       | <i>P. falciparum</i>     | Yes                                                | No                                                    | No                                      |
| <i>An. cruzii</i>       | <i>P. vivax</i>          | Yes                                                | No                                                    | No                                      |
| <i>An. cruzii</i>       | <i>P. vivax</i>          | Yes                                                | No                                                    | No                                      |
| <i>An. cruzii</i>       | <i>P. vivax</i>          | Yes                                                | No                                                    | No                                      |
| <i>An. cruzii</i>       | <i>P. vivax</i>          | Yes                                                | Yes                                                   | Yes                                     |
| <i>An. cruzii</i>       | <i>P. falciparum</i>     | Yes                                                | Yes                                                   | No                                      |
| <i>An. cruzii</i>       | <i>P. falciparum</i>     | Yes                                                | Yes                                                   | Yes                                     |
| <i>An. cruzii</i>       | <i>P. falciparum</i>     | Yes                                                | No                                                    | No                                      |
| <i>An. cruzii</i>       | <i>P. falciparum</i>     | Yes                                                | Yes                                                   | Yes                                     |
| <i>An. cruzii</i>       | <i>P. falciparum</i>     | Yes                                                | Yes                                                   | Yes                                     |
| <i>An. cruzii</i>       | <i>P. falciparum</i>     | Yes                                                | Yes                                                   | Yes                                     |
| <i>An. cruzii</i>       | <i>P. falciparum</i>     | Yes                                                | Yes                                                   | Yes                                     |
| <i>An. cruzii</i>       | <i>P. falciparum</i>     | Yes                                                | Yes                                                   | Yes                                     |
| <i>An. cruzii</i>       | <i>P. falciparum</i>     | Yes                                                | Yes                                                   | Yes                                     |
| <i>An. cruzii</i>       | <i>P. falciparum</i>     | Yes                                                | Yes                                                   | Yes                                     |
| <i>An. cruzii</i>       | <i>P. falciparum</i>     | Yes                                                | No                                                    | No                                      |
| <i>An. cruzii</i>       | <i>P. falciparum</i>     | Yes                                                | Yes                                                   | Yes                                     |
| <i>An. cruzii</i>       | <i>P. falciparum</i>     | Yes                                                | Yes                                                   | Yes                                     |
| <i>An. cruzii</i>       | <i>P. falciparum</i>     | Yes                                                | Yes                                                   | Yes                                     |
| <i>An. cruzii</i>       | <i>P. falciparum</i>     | Yes                                                | Yes                                                   | Yes                                     |
| <i>An. cruzii</i>       | <i>P. falciparum</i>     | Yes                                                | Yes                                                   | Yes                                     |
| <i>An. cruzii</i>       | <i>P. falciparum</i>     | Yes                                                | Yes                                                   | Yes                                     |
| <i>An. triannulatus</i> | <i>P. falciparum</i>     | Yes                                                | No                                                    | No                                      |
| <i>An. strodei</i>      | <i>P. falciparum</i>     | Yes                                                | No                                                    | No                                      |
| <i>An. galvaoi</i>      | <i>P. falciparum</i>     | Yes                                                | Yes                                                   | Yes                                     |
